# Supplementary material
Source: HighWire-hosted journal article supplement (https://erj.ersjournals.com/content/59/3/2102538)
Supplement: inline-supplementary-material-1 [file inline-supplementary-material-1.pdf]

### Electronic Annex 1. Study plan (Gantt chart)

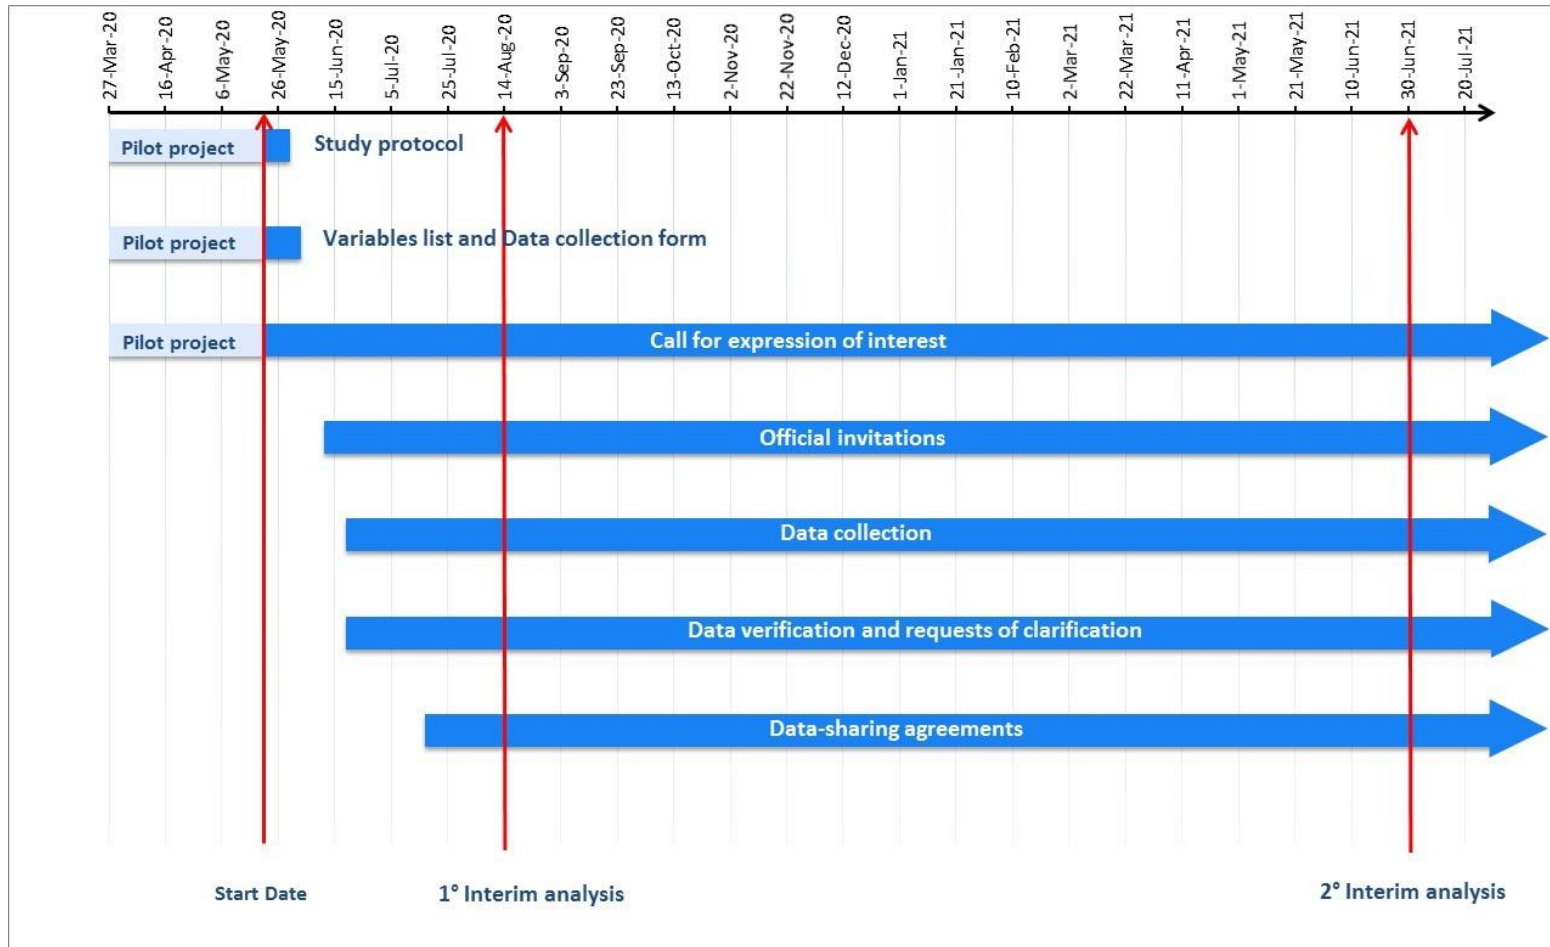

**Electronic Annex 2. Cases reported by participating countries and countries' estimated coverage at the time of data reporting**

| Countries          | Cases enrolled<br>N | Centres<br>N      | Estimated coverage <sup>Ω</sup>                                                                                        |
|--------------------|---------------------|-------------------|------------------------------------------------------------------------------------------------------------------------|
| Argentina          | 30                  | 1                 | 12.5%* (Buenos Aires)                                                                                                  |
| Australia          | 2                   | 2                 | 20% <sup>§</sup> (New South Wales)                                                                                     |
| Belarus            | 3                   | 1                 | 10%* (Minsk)                                                                                                           |
| Belgium            | 1                   | 1                 | 100%* (Namur)                                                                                                          |
| Brazil             | 66                  | 6                 | 80% <sup>§</sup> (Rio Grande do Sul & Goiás)<br>40% <sup>§</sup> (Bahia & São Paulo)                                   |
| Canada             | 1                   | 1                 | 5% <sup>§</sup> (Ontario)                                                                                              |
| Chile              | 70                  | 47                | 100% <sup>^</sup> (Whole country)                                                                                      |
| China              | 4                   | 2                 | 100%* (Wenzhou and Luzhou)                                                                                             |
| Colombia           | 2                   | 1                 | 10% <sup>^</sup> (Whole country)                                                                                       |
| France             | 10                  | 6                 | 50% <sup>^</sup> (Whole country)                                                                                       |
| Greece             | 1                   | 1                 | 80% <sup>#</sup> (Northern Region)<br>20% <sup>^</sup> (Whole country)                                                 |
| Guinea Republic    | 2                   | 1                 | 100%* (Conakry)<br>20% <sup>^</sup> (Whole country)                                                                    |
| Honduras           | 23                  | 7                 | 100% <sup>^</sup> (Whole country)                                                                                      |
| India              | 37                  | 3                 | 80%* (New Delhi)<br>20%* (Nagpur)<br>10%* (Mumbai)                                                                     |
| Italy              | 58                  | 10                | 80% <sup>^</sup> (Whole country)                                                                                       |
| Lithuania          | 27                  | 2                 | 100%* (Vilnius and Klaipedia)                                                                                          |
| Mexico             | 17                  | 9                 | 30% <sup>^</sup> (Whole country)                                                                                       |
| Netherlands        | 1                   | 1                 | 100% <sup>^</sup> (Whole country)                                                                                      |
| Niger              | 1                   | 1                 | 100% <sup>^</sup> (Whole country)                                                                                      |
| Oman               | 13                  | 4                 | 100% <sup>^</sup> (Whole country)                                                                                      |
| Panama             | 8                   | 1                 | 100% <sup>^</sup> (Whole country)                                                                                      |
| Paraguay           | 80                  | 17                | 100% <sup>^</sup> (Whole country)                                                                                      |
| Peru               | 32                  | 2                 | 80% <sup>^</sup> (Whole country)                                                                                       |
| Portugal           | 2                   | 2                 | 100%* (Vila Nova de Gaia and Espinho)                                                                                  |
| Romania            | 23                  | 2                 | 100%* (Craiova)<br>10% <sup>#</sup> (South Western Region)<br>100%* (Timisoara)<br>10.5% <sup>#</sup> (Western Region) |
| Russian Federation | 65                  | 3                 | 100%** (Moscow, Arkhangelsk & Volgograd)                                                                               |
| Serbia             | 6                   | 1                 | 100% <sup>^</sup> (Whole country)                                                                                      |
| Singapore          | 24                  | 2                 | 75% <sup>^</sup> (Whole country)                                                                                       |
| Slovakia           | 3                   | 1                 | 100% <sup>^</sup> (Whole country)                                                                                      |
| South Africa       | 15                  | 7                 | 25% <sup>#</sup> (Western Cape Province)                                                                               |
| Spain              | 24                  | 8                 | 70% <sup>^</sup> (Whole country)                                                                                       |
| Switzerland        | 1                   | 1                 | 100% <sup>#</sup> (Vaud Canton)                                                                                        |
| United Kingdom     | 64                  | 2                 | 25%* (London)                                                                                                          |
| USA                | 51                  | 16                | 375 <sup>§</sup> (Virginia State)                                                                                      |
| <b>TOTAL= 34</b>   | <b>TOTAL= 767</b>   | <b>TOTAL= 172</b> | <b>RANGE (5%-100%)</b>                                                                                                 |

Legend: <sup>Ω</sup> Countries' estimate of the national/subnational coverage of the TB/COVID-19 (TB: tuberculosis; COVID-19: acute respiratory syndrome coronavirus 2 (SARS-CoV-2)) cases at the time of data reporting; \*estimated coverage in the metropolitan area(s) reporting; <sup>§</sup> estimated coverage in the state(s) reporting; <sup>#</sup> estimated coverage in the region/province/canton reporting; \*\*estimated coverage in the 3 Oblasts reporting; <sup>^</sup> estimated coverage compared to cases reported in the whole country

**Electronic Annex 3: Comorbidities prior to COVID-19 diagnosis in 767 patients of the TB/COVID-19 cohort**

| <b>PATIENTS WITH &gt;=1 COMORBIDITIES</b> | <b>ALIVE (N=343) n(%)</b> | <b>DEAD (N=73) n(%)</b> |
|-------------------------------------------|---------------------------|-------------------------|
| <b>CARDIOVASCULAR DISEASE</b>             |                           |                         |
| Hypertension                              | 81 (23.6)                 | 27 (37.0)               |
| Congestive Heart Failure                  | 16 (4.7)                  | 12 (16.4)               |
| Ischemic heart disease                    | 14 (4.1)                  | 14 (19.2)               |
| Stroke                                    | 6 (1.7)                   | 9 (12.3)                |
| Atrial fibrillation                       | 4 (1.2)                   | 4 (5.5)                 |
| Other Cardiovascular disease              | 10 (2.9)                  | 4 (5.5)                 |
| <b>ENDOCRINE DISEASE</b>                  |                           |                         |
| Diabetes Mellitus                         | 125 (36.4)                | 32 (43.8)               |
| Hypothyroidism                            | 6 (1.7)                   | 3 (4.1)                 |
| <b>IMMUNOCOMPROMISING CONDITIONS</b>      |                           |                         |
| HIV                                       | 68 (19.8)                 | 12 (16.4)               |
| Autoimmune Disease                        | 18 (5.2)                  | 3 (4.1)                 |
| Organ Transplant                          | 4 (1.2)                   | 2 (2.7)                 |
| <b>RESPIRATORY DISEASE</b>                |                           |                         |
| Other Lung Disease                        | 56 (16.3)                 | 21 (28.8)               |
| Asthma                                    | 18 (5.2)                  | 6 (8.2)                 |
| <b>LIVER DISEASE</b>                      |                           |                         |
|                                           | 50 (14.6)                 | 10 (13.7)               |
| <b>RENAL DISEASE</b>                      |                           |                         |
|                                           | 38 (11.1)                 | 15 (20.5)               |
| <b>CANCER</b>                             |                           |                         |
|                                           | 23 (6.7)                  | 11 (15.1)               |
| <b>PSYCHIATRIC DISORDERS</b>              |                           |                         |
|                                           | 18 (5.2)                  | 8 (11.0)                |
| <b>NUTRITION DISORDERS</b>                |                           |                         |
|                                           | 5 (1.5)                   | 3 (4.1)                 |
| <b>OTHER DISEASES</b>                     |                           |                         |
|                                           | 8 (2.3)                   | 3 (4.1)                 |

Legend: TB: tuberculosis; COVID-19: acute respiratory syndrome coronavirus 2 (SARS-CoV-2)
